# Supplementary material for: Patterns of histopathology presentation of breast cancer in a tertiary hospital in Somalia
Source: Research Square preprint supplement (doi:10.21203/rs.3.rs-7396828/v1), 2025-08-27
Supplement: Supplementary file 1 [file a92f4934d045a2f35e3ec6d0.docx]

**Highlights**

- Breast cancer affects mostly middle-aged Somali women (40–59 years).
- Invasive ductal carcinoma is the most common histological subtype (85%).
- Most patients present at stage II or III with moderate to poor differentiation.
- Lack of screening and diagnostic tools contributes to delayed presentation.
- Study underscores urgent need for improved breast cancer care in Somalia.
